# Supplementary material for: Iterative sub-network component analysis enables reconstruction of large scale genetic networks
Source: PubMed Central journal article supplement (PMC4634733; doi:10.1186/s12859-015-0768-9), 2015-11-04
Supplement: 12859_2015_768_MOESM1_ESM.pdf [file 12859_2015_768_MOESM1_ESM.pdf]

## ISNCA formulation for shared TFs and TGs

The current proposed algorithm, the iterative sub-network component analysis (ISNCA) is extended easily to solve the NCA compliant sub-networks that share common TFs and TGs. In order to apply the ISNCA algorithm, we first divide the network into two compliant sub-networks. The expression and connectivity matrices for each sub-network can be represented by

$$E_1 = \begin{bmatrix} E_{u1} \\ E_c \end{bmatrix}, E_2 = \begin{bmatrix} E_{u2} \\ E_c \end{bmatrix} \quad (1)$$

and

$$A_1 = \begin{bmatrix} A_{uu1} & A_{uc1} \\ A_{cu1} & A_{ccc} \end{bmatrix}, A_2 = \begin{bmatrix} A_{ccc} & A_{cu2} \\ A_{uc2} & A_{uu2} \end{bmatrix} \quad (2)$$

with  $E_{ui} \in \mathbb{R}^{nui \times m}$  and  $E_c \in \mathbb{R}^{nc \times m}$  denote the expression matrices of sub-networks  $i = 1, 2$ .  $A_{uu1} \in \mathbb{R}^{nui \times lui}$ ,  $A_{cui} \in \mathbb{R}^{nc \times lui}$ ,  $A_{uci} \in \mathbb{R}^{nci \times lc}$ , and  $A_{ccc} \in \mathbb{R}^{nc \times lc}$  are the partition matrices of  $A$ , of sub network  $i = 1, 2$ , the subscript indices  $u, c$  denotes the unique and common components of the sub networks. The first, second and third subscript indices of any partition matrices denote TGs, TFs and sub-networks respectively. In all the following, when we write  $A_i, E_i$  or  $P_i$ , we refer to matrices of the entire sub-network  $i$ , including both its exclusive and common components.

The entire network can be described in the following manner:

$$A = \begin{bmatrix} A_{uu1} & A_{uc1} & \mathbf{O}_2 \\ A_{cu1} & A_{ccc} & A_{cu2} \\ \mathbf{O}_1 & A_{uc2} & A_{uu2} \end{bmatrix} \quad (3)$$

The matrices  $\mathbf{O}_1 \in \mathbb{R}^{nu2 \times lu1}$  and  $\mathbf{O}_2 \in \mathbb{R}^{nu1 \times lu2}$  denote zero matrices. The corresponding partitions of  $E$  and  $P$  are obtained as follows:

$$E = \begin{bmatrix} E_{u1} \\ E_c \\ E_{u2} \end{bmatrix}, \quad P = \begin{bmatrix} P_{u1} \\ P_c \\ P_{u2} \end{bmatrix} \quad (4)$$

where,  $P_{ui} \in \mathbb{R}^{lui \times m}$ ,  $P_c \in \mathbb{R}^{lc \times m}$  are the activities of unique and common TFs of sub-network  $i$  respectively. Note that  $P$  contains both unique and common components.

**Example 1.** *Network decomposition: Consider the network presented in the supplementary Figure S3). The connectivity matrix  $A$  can be decomposed to the exclusive components and the common components in the following*

manner:

$$A = \begin{bmatrix} A_{uu1} & A_{uc1} & \mathbf{O}_2 \\ A_{cu1} & A_{ccc} & A_{cu2} \\ \mathbf{O}_1 & A_{uc2} & A_{uu2} \end{bmatrix} = \begin{array}{c} \frac{tg_5}{tg_1} \\ \frac{tg_2}{tg_3} \\ \frac{tg_6}{tg_7} \\ \frac{tg_4}{tf_4} \end{array} \begin{array}{c|c|c|c} \frac{tf_1}{1} & \frac{tf_3}{0} & \frac{tf_2}{0} & \frac{tf_4}{0} \\ \hline 1 & 0 & 1 & 1 \\ 1 & 1 & 0 & 0 \\ 0 & 1 & 1 & 0 \\ 0 & 1 & 0 & 0 \\ 1 & 0 & 0 & 1 \\ \hline 0 & 0 & 1 & 0 \end{array} \quad (5)$$

and partition matrices for sub-networks 1 and 2 respectively are,

$$A_{uu1} = [1], \quad A_{uc1} = [0], \quad A_{cu1} = \begin{bmatrix} 0 \\ 1 \\ 1 \\ 0 \\ 0 \end{bmatrix}, \quad A_{ccc} = \begin{bmatrix} 1 \\ 1 \\ 0 \\ 1 \\ 1 \end{bmatrix}, \quad \mathbf{O}_1 = [0] \quad (6)$$

$$A_{uu2} = [1 \ 0], \quad A_{uc2} = [0], \quad A_{cu2} = \begin{bmatrix} 1 & 1 \\ 0 & 0 \\ 1 & 0 \\ 0 & 0 \\ 0 & 1 \end{bmatrix}, \quad A_{ccc} = \begin{bmatrix} 1 \\ 1 \\ 0 \\ 1 \\ 1 \end{bmatrix}, \quad \mathbf{O}_2 = [0 \ 0] \quad (7)$$

To initialize the ISNCA algorithm, we divide the expression matrix,  $E$  to  $E_i$  using equation 1 and connectivity matrix,  $A$  to  $A_i$  using equation 2. At the start of each iteration  $k$ , we compute solution to  $\|E_i(k) - A_i P_i\|$ , separately for sub-networks 1 and 2 using any standard NCA method, and obtain  $\hat{A}_i(k)$  and  $\hat{P}_{ui}(k)$ . We can then proceed to construct  $\hat{A}(k)$  and  $\hat{P}(k)$  by combining equations 2 and 3, as

$$\hat{A}(k) = \begin{bmatrix} \hat{A}_{uu1} & \hat{A}_{uc1} & \mathbf{O}_2 \\ \hat{A}_{cu1} & \hat{A}_{ccc} & \hat{A}_{cu2} \\ \mathbf{O}_1 & \hat{A}_{uc2} & \hat{A}_{uu2} \end{bmatrix}, \hat{P}(k) = \begin{bmatrix} \hat{P}_{u1}(k) \\ \hat{P}_c \\ \hat{P}_{u2}(k) \end{bmatrix} \quad (8)$$

and calculate the error of the entire network,

$$e(k) = \|E - \hat{A}\hat{P}\|_F \quad (9)$$

Here,  $\hat{A}_{cc}$  and  $\hat{P}_c$  are calculated from both sub networks 1 and 2. Therefore it is important to choose the best contribution either from sub network 1 or 2 or average of 1 and 2 based on the lowest error of reconstruction according to equation 9. If the error does not converge (see below), we proceed to update the sub-networks in the following manner. Let  $T_i(k)$  be the common TGs contribution from sub-networks  $i$ , that is,

$$T_1(k) = \hat{A}_{cc1}(k)\hat{P}_{c1}(k), \quad T_2(k) = \hat{A}_{cc2}(k)\hat{P}_{c2}(k) \quad (10)$$

We then update the matrices  $E_1$  and  $E_2$  for next iteration, from equation 11 by subtracting the common TGs contribution from other sub-network, that is,

$$E_1(k+1) = \begin{bmatrix} E_{u1} \\ E_c - \delta \cdot T_2(k) \end{bmatrix}, \quad E_2(k+1) = \begin{bmatrix} E_{u2} \\ E_c - \delta \cdot T_1(k) \end{bmatrix} \quad (11)$$

Here,  $\delta \in [0, 1]$  denotes the attenuation factor (see below for details). Notice that  $E_c$  and  $E_{ui}$  do not change from iteration to iteration as they represent the original expression matrices. We then proceed to the next iteration and predict the solution to the expression  $\|E_i(k+1) - A_i P_i\|$  using standard NCA methods. We keep iterating until the reconstruction error in equation 9 for the entire network is sufficiently small, for instance by

$$e(k+1) - e(k) < \epsilon \quad (12)$$

In simulations, we can set  $\epsilon$  to be 1e-05 and maximum number of iterations to 100.
